# Supplementary material for: Fecal Microbiome Differences in Angus Steers with Differing Feed Efficiencies during the Feedlot-Finishing Phase
Source: MDPI journal article supplement (doi:10.3390/microorganisms10061128), 2022-05-31
Supplement: s1 [file s1]

**Supplemental Table S1.** Performance of each animal used in the study during the feedlot-finishing phase. RFI = Residual Feed Intake; DMI = Dry Matter Intake; ADG = Average Daily Gain; FG = Feed to Gain ratio; HCW = Hot Carcass Weight; RIBEYE = Ribeye Area; MARB = Carcass Marbling Score.

| SampleID | AnimalID | SampleType | RFIStatus | DMI   | ADG  | FG    | RFI   | HCW    | RIBEYE | MARB |
|----------|----------|------------|-----------|-------|------|-------|-------|--------|--------|------|
| 69       | 7024     | OFFTEST    | High      | 12.10 | 1.02 | 11.92 | 0.30  | 346.73 | 70.79  | 480  |
| 90       | 7024     | ONTEST     | High      | 12.10 | 1.02 | 11.92 | 0.30  | 346.73 | 70.79  | 480  |
| 70       | 7043     | OFFTEST    | High      | 13.15 | 0.95 | 13.78 | 0.45  | 391.09 | 88.47  | 570  |
| 91       | 7043     | ONTEST     | High      | 13.15 | 0.95 | 13.78 | 0.45  | 391.09 | 88.47  | 570  |
| 73       | 7059     | OFFTEST    | High      | 12.04 | 1.06 | 11.40 | 0.32  | 344.23 | 75.19  | 620  |
| 87       | 7059     | ONTEST     | High      | 12.04 | 1.06 | 11.40 | 0.32  | 344.23 | 75.19  | 620  |
| 76       | 7135     | OFFTEST    | High      | 15.30 | 1.13 | 13.56 | 2.44  | 416.62 | 88.11  | 650  |
| 92       | 7135     | ONTEST     | High      | 15.30 | 1.13 | 13.56 | 2.44  | 416.62 | 88.11  | 650  |
| 77       | 7141     | OFFTEST    | High      | 12.19 | 0.97 | 12.56 | 0.46  | 332.44 | 70.60  | 730  |
| 88       | 7141     | ONTEST     | High      | 12.19 | 0.97 | 12.56 | 0.46  | 332.44 | 70.60  | 730  |
| 79       | 7011     | OFFTEST    | Low       | 10.42 | 1.00 | 10.37 | -0.69 | 345.18 | 74.84  | 580  |
| 89       | 7011     | ONTEST     | Low       | 10.42 | 1.00 | 10.37 | -0.69 | 345.18 | 74.84  | 580  |
| 72       | 7050     | OFFTEST    | Low       | 13.07 | 1.48 | 8.81  | -0.78 | 368.09 | 91.24  | 710  |
| 85       | 7050     | ONTEST     | Low       | 13.07 | 1.48 | 8.81  | -0.78 | 368.09 | 91.24  | 710  |
| 74       | 7112     | OFFTEST    | Low       | 10.52 | 1.12 | 9.42  | -1.55 | 360.61 | 73.61  | 510  |
| 82       | 7112     | ONTEST     | Low       | 10.52 | 1.12 | 9.42  | -1.55 | 360.61 | 73.61  | 510  |
| 75       | 7124     | OFFTEST    | Low       | 10.16 | 0.70 | 14.52 | -1.22 | 421.84 | 76.24  | 670  |
| 83       | 7124     | ONTEST     | Low       | 10.16 | 0.70 | 14.52 | -1.22 | 421.84 | 76.24  | 670  |
| 78       | 7164     | OFFTEST    | Low       | 10.31 | 0.78 | 13.22 | -1.19 | 397.07 | 96.36  | 780  |
| 80       | 7164     | ONTEST     | Low       | 10.31 | 0.78 | 13.22 | -1.19 | 397.07 | 96.36  | 780  |
